# Supplementary material
Source: publisher figshare collection journal article supplement (https://acs.figshare.com/ndownloader/files/4283517)

# Facile Self-Assembly of Supramolecular Hexakisferrocenyl Triangles via Coordination-Driven Self-Assembly and Their Electrochemical Behavior

Guang-Zhen Zhao<sup>a</sup>, Quan-Jie Li<sup>b</sup>, Li-Jun Chen<sup>a</sup>, Hongwei Tan<sup>\*,b</sup>, Cui-Hong Wang<sup>a</sup>,

Danielle A. Lehman<sup>c</sup>, David C. Muddiman<sup>c</sup>, Hai-Bo Yang<sup>\*,a</sup>

hbyang@chem.ecnu.edu.cn

<sup>a</sup> Shanghai Key Laboratory of Green Chemistry and Chemical Processes, Department of Chemistry, East China Normal University, 3663 N. Zhongshan Road, Shanghai, 200062, P. R. China. Fax: +86-21-62235137; Tel: +86-21-62235137; E-mail: hbyang@chem.ecnu.edu.cn;

<sup>b</sup> Department of Chemistry, Beijing Normal University, Beijing 100050, P. R. China.

<sup>c</sup> W. M. Keck FT-ICR Mass Spectrometry Laboratory and Department of Chemistry, North Carolina State University, Raleigh, North Carolina 27695, United States.

## Electronic Supplementary Information

### Table of Contents:

|                                                                                          |     |
|------------------------------------------------------------------------------------------|-----|
| 1. General Information .....                                                             | S2  |
| 2. Synthetic Procedures and Characterizations .....                                      | S3  |
| 3. <sup>1</sup> H, <sup>31</sup> P and <sup>13</sup> C NMR Spectra of New Compounds..... | S5  |
| 4. Cyclic Voltammetry.....                                                               | S12 |
| 5. The model structures of <b>6b</b> and <b>6c</b> .....                                 | S12 |

## 1. General Information

All solvents were dried according to standard procedures and all of them were degassed under  $\text{N}_2$  for 30 minutes before use. Reagents were used as purchased. All air-sensitive reactions were carried out under argon atmosphere.  $^1\text{H}$  NMR,  $^{13}\text{C}$  NMR and  $^{31}\text{P}$  NMR spectra were recorded on Bruker 400 MHz Spectrometer ( $^1\text{H}$ : 400 MHz;  $^{13}\text{C}$ : 100 MHz;  $^{31}\text{P}$ : 161.9 MHz) at 298 K. The  $^1\text{H}$  and  $^{13}\text{C}$  NMR chemical shifts are reported relative to residual solvent signals, and  $^{31}\text{P}$  NMR resonances are referenced to an internal standard sample of 85%  $\text{H}_3\text{PO}_4$  ( $\delta$  0.0). Coupling constants ( $J$ ) are denoted in Hz and chemical shifts ( $\delta$ ) in ppm. Multiplicities are denoted as follows: s = singlet, d = doublet, m = multiplet, br = broad.

## 2. Synthetic Procedures and Characterizations

**Scheme S1.** Synthesis of 60° ferrocenyl building block **4**

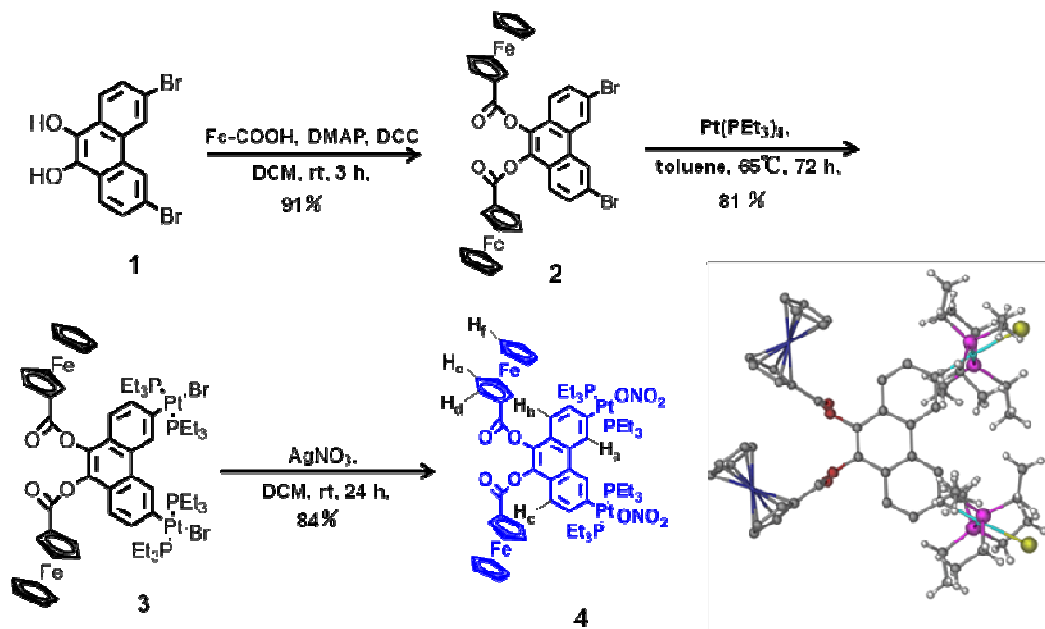

**Synthesis of compound 2:** To a solution of ferrocene carboxylic acid (435 mg, 1.89 mmol) in 15 ml anhydrous dichloromethane was added catalytic amount (10 %) of DMAP and 2,9-dibromo-5,6-dihydroxyphenanthrene (**1**) (349 mg, 0.945 mmol). DCC (429 mg, 2.10 mmol) was then added to the reaction mixture at 0 °C, followed by stirring for 5 min at 0°C and 3h at room temperature. Precipitated urea was then filtered off and the filtrate was evaporated under vacuo. The residue was taken up in 100 ml CH<sub>2</sub>Cl<sub>2</sub>, washed twice with 0.5 N HCl and with saturated NaHCO<sub>3</sub> solution, and then dried over MgSO<sub>4</sub>. The residue was purified by column chromatography on silica gel (acetone/hexane: 1/2) to give compound **2**. Yield: 0.54 g, 91% (orange solid). *R<sub>f</sub>* = 0.40 (1/1: acetone/hexane). Mp >300 °C. <sup>1</sup>H NMR (CDCl<sub>3</sub>, 400 MHz): δ 8.80 (s, 2H), 7.98 (d, *J* = 8.8 Hz, 2H), 7.79 (d, *J* = 8.4 Hz, 2H), 5.08 (s, 4H), 4.54 (s, 4H), 4.27 (s, 10H), <sup>13</sup>C NMR (CDCl<sub>3</sub>, 167.6 MHz): δ 169.1, 136.4, 131.0, 129.9, 126.6, 125.9, 124.0, 121.7, 72.1, 70.9, 70.0, 69.4. MALDI Mass: 792.9 [M+H]<sup>+</sup>, 814.9 [M+Na]<sup>+</sup>.

**Synthesis of compound 3:** A 50-mL Schlenk flask was charged under nitrogen with **2**

(100 mg, 0.126 mmol) and Pt(PEt<sub>3</sub>)<sub>4</sub> (336 mg, 0.504 mmol). Freshly distilled toluene (10 mL) was added to the flask under nitrogen by syringe, and the resulting bright red solution was stirred for 72 h at 65 °C. The solvent was then removed in vacuo. The orange solid was washed with methanol (3 × 10 mL) and dried in vacuo. Yield: 0.31 g, 81%; mp 269-270 °C. <sup>1</sup>H NMR (CDCl<sub>3</sub>, 400 MHz): δ 8.57 (s, 2H), 7.63 (s, 4H), 5.07 (s, 4H), 4.49 (s, 4H), 4.25 (s, 10H), 1.68 (s, 24H), 1.06-1.10 (m, 36H). <sup>13</sup>C NMR (CDCl<sub>3</sub>, 167.6 MHz): δ 169.6, 139.4, 136.3, 134.2, 129.4, 129.3, 122.9, 120.5, 71.8, 70.8, 70.3, 70.0, 14.1, 7.8. <sup>31</sup>P{<sup>1</sup>H}NMR (CDCl<sub>3</sub>, 161.9 MHz): δ 12.7 (s, <sup>1</sup>J<sub>Pt-P</sub> = 2741.0 Hz).

**Synthesis of compound 4:** Dibromide complex **3** (156 mg, 0.093 mmol) and AgNO<sub>3</sub> (157 mg, 0.93 mmol) were placed in a 2-dram vial followed by 3 mL of dichloromethane. The reaction was stirred in the dark at room temperature for 24 h. A clear solution with a heavy creamy precipitate resulted, the precipitate was filtered off, and the solvent was removed under a flow of nitrogen. The residue was redissolved in a minimal amount of dichloromethane, and then *n*-pentane was carefully added to precipitate the residual AgNO<sub>3</sub>, but not the product. The cloudy solution was filtered through a glass fiber filter, and the product was then precipitated by the addition of more *n*-pentane. The supernatant was decanted, and the product was obtained as orange solid and dried in vacuo overnight. Yield: 126 mg, 84%; mp 194-195 °C. <sup>1</sup>H NMR (CDCl<sub>3</sub>, 400 MHz): δ 8.50 (s, 2H), 7.64(s, 4H), 5.07 (s, 4H), 4.50 (s, 4H), 4.24 (s, 10H), 1.53 (s, 24H), 1.13-1.18 (m, 36H). <sup>31</sup>P{<sup>1</sup>H} NMR (CDCl<sub>3</sub>, 161.9 MHz): δ 19.06 (s, <sup>1</sup>J<sub>Pt-P</sub> = 2867.2 Hz). MALDI Mass: 1557.1 [M-NO<sub>3</sub>]<sup>+</sup>

### 3. $^1\text{H}$ , $^{31}\text{P}$ and $^{13}\text{C}$ NMR Spectra of New Compounds

Figure S1. A)  $^1\text{H}$  and B)  $^{13}\text{C}$  NMR Spectra of Complex **2** in  $\text{CDCl}_3$

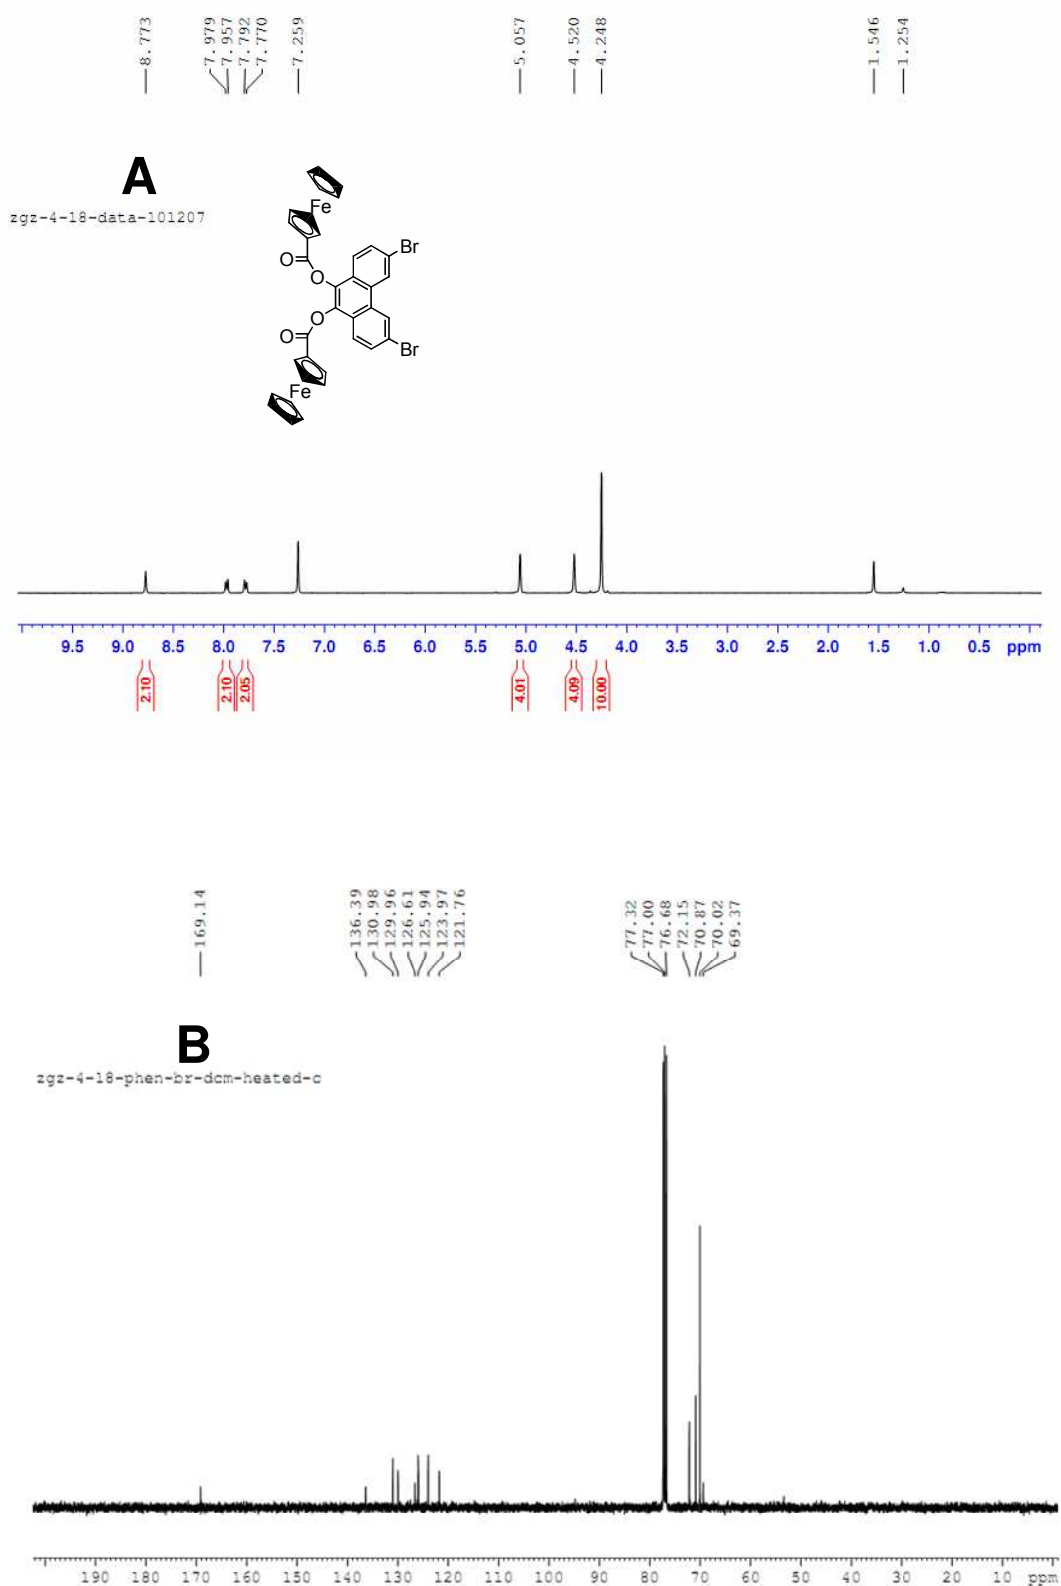

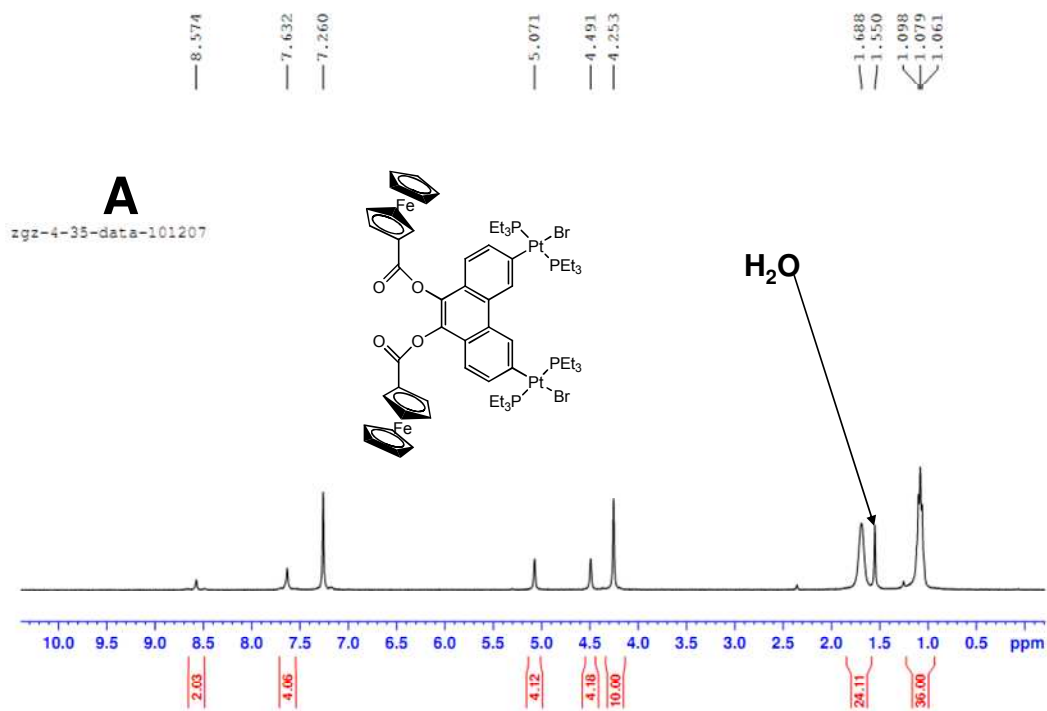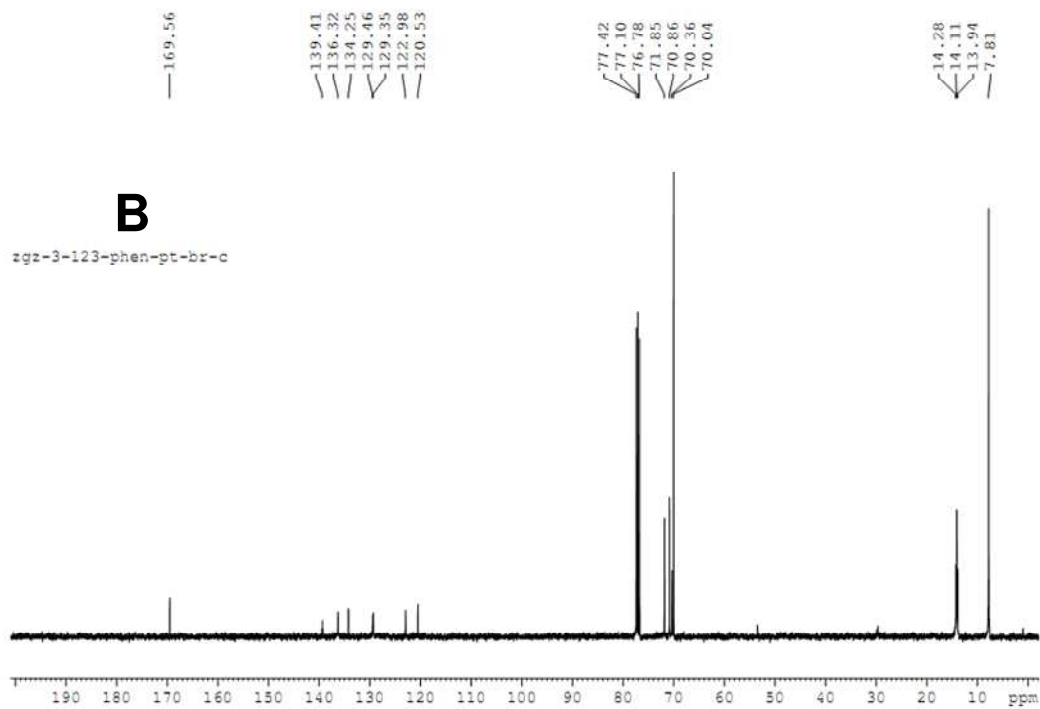

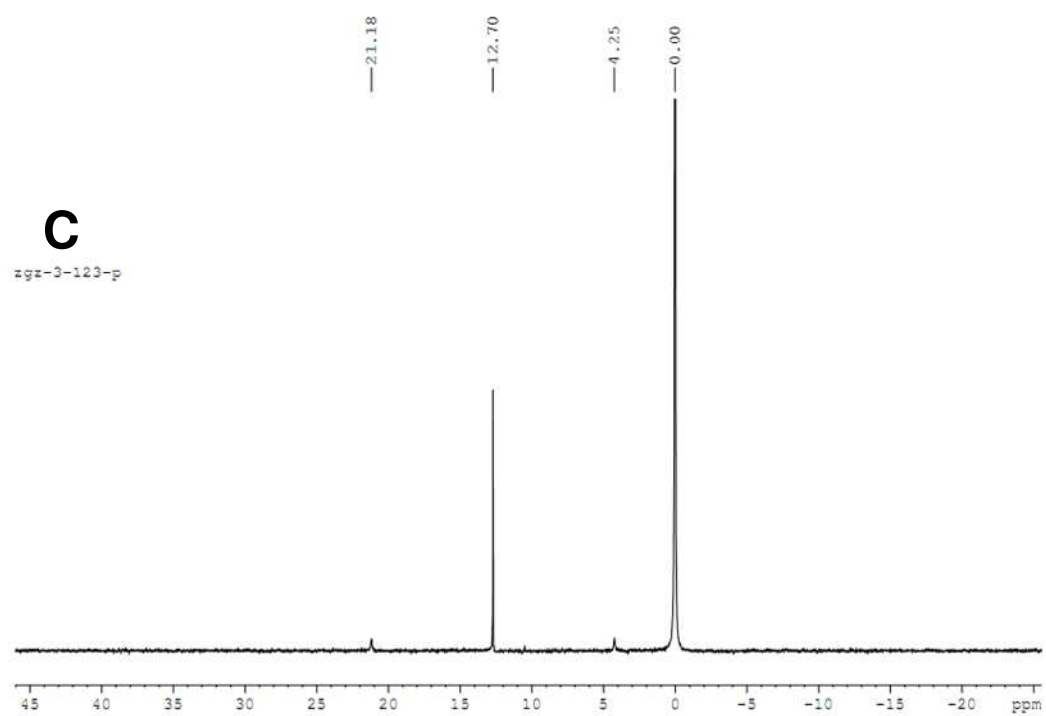

Figure S3. A)  $^1\text{H}$  and B)  $^{31}\text{P}$  NMR Spectra of Complex **4** in  $\text{CDCl}_3$

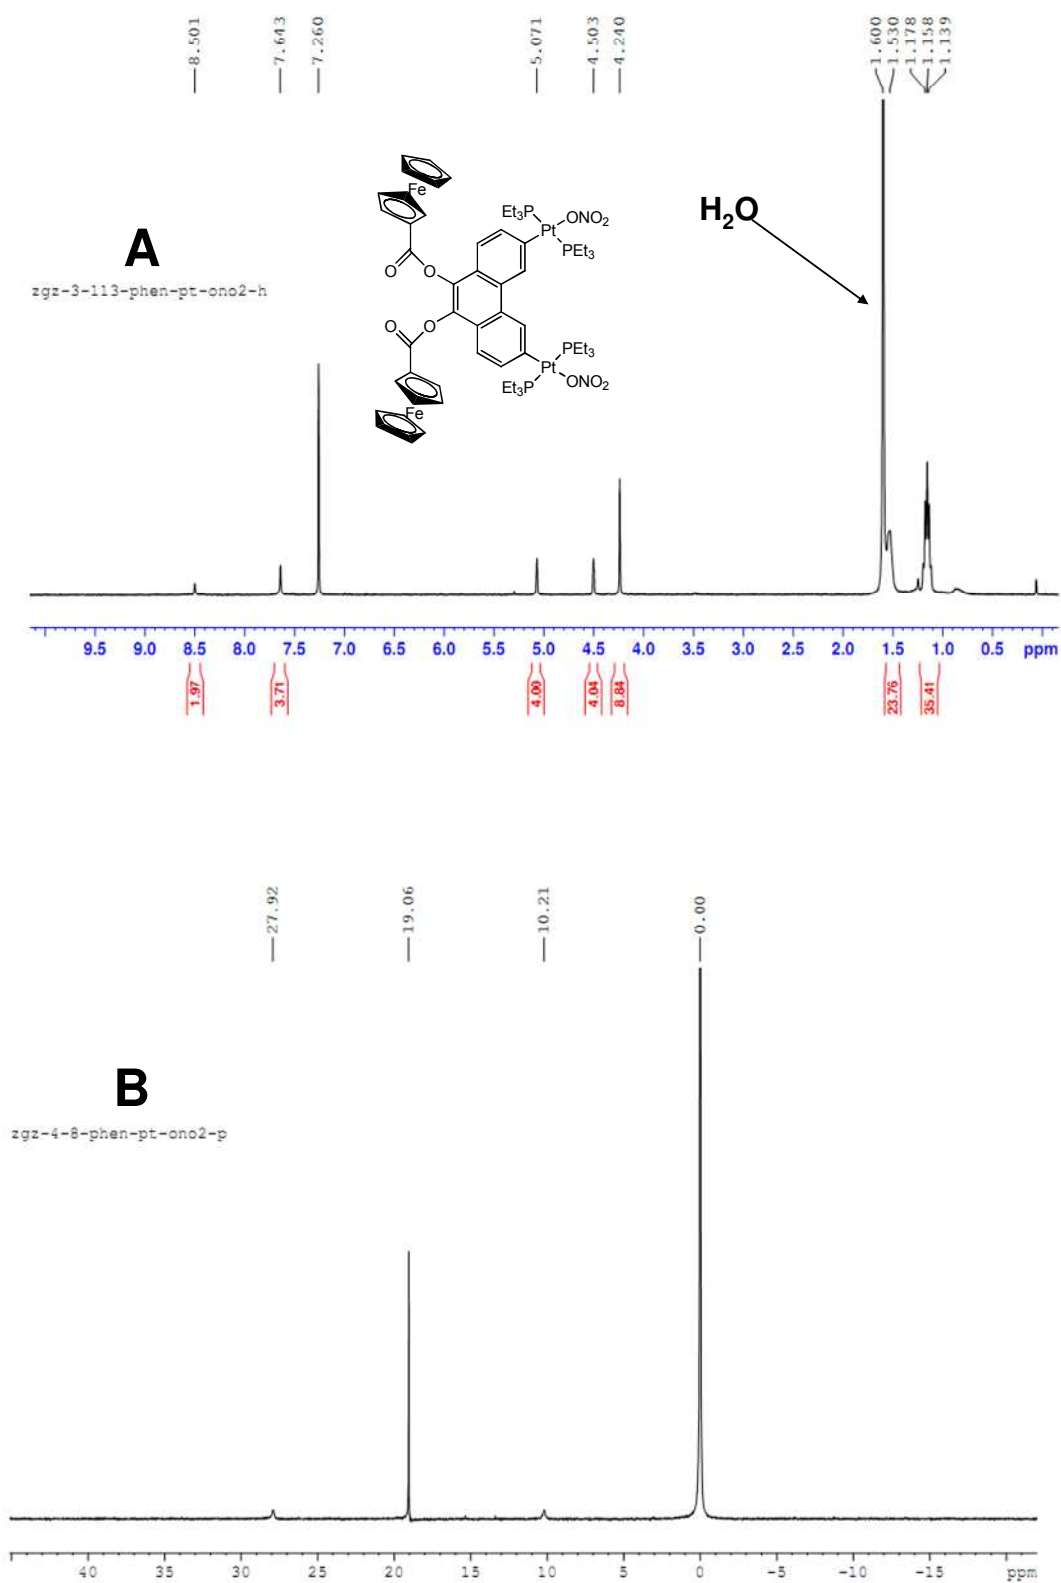



Figure S4. A)  $^1\text{H}$  and B)  $^{31}\text{P}$  NMR Spectra of Complex **6a** in  $\text{CD}_2\text{Cl}_2$

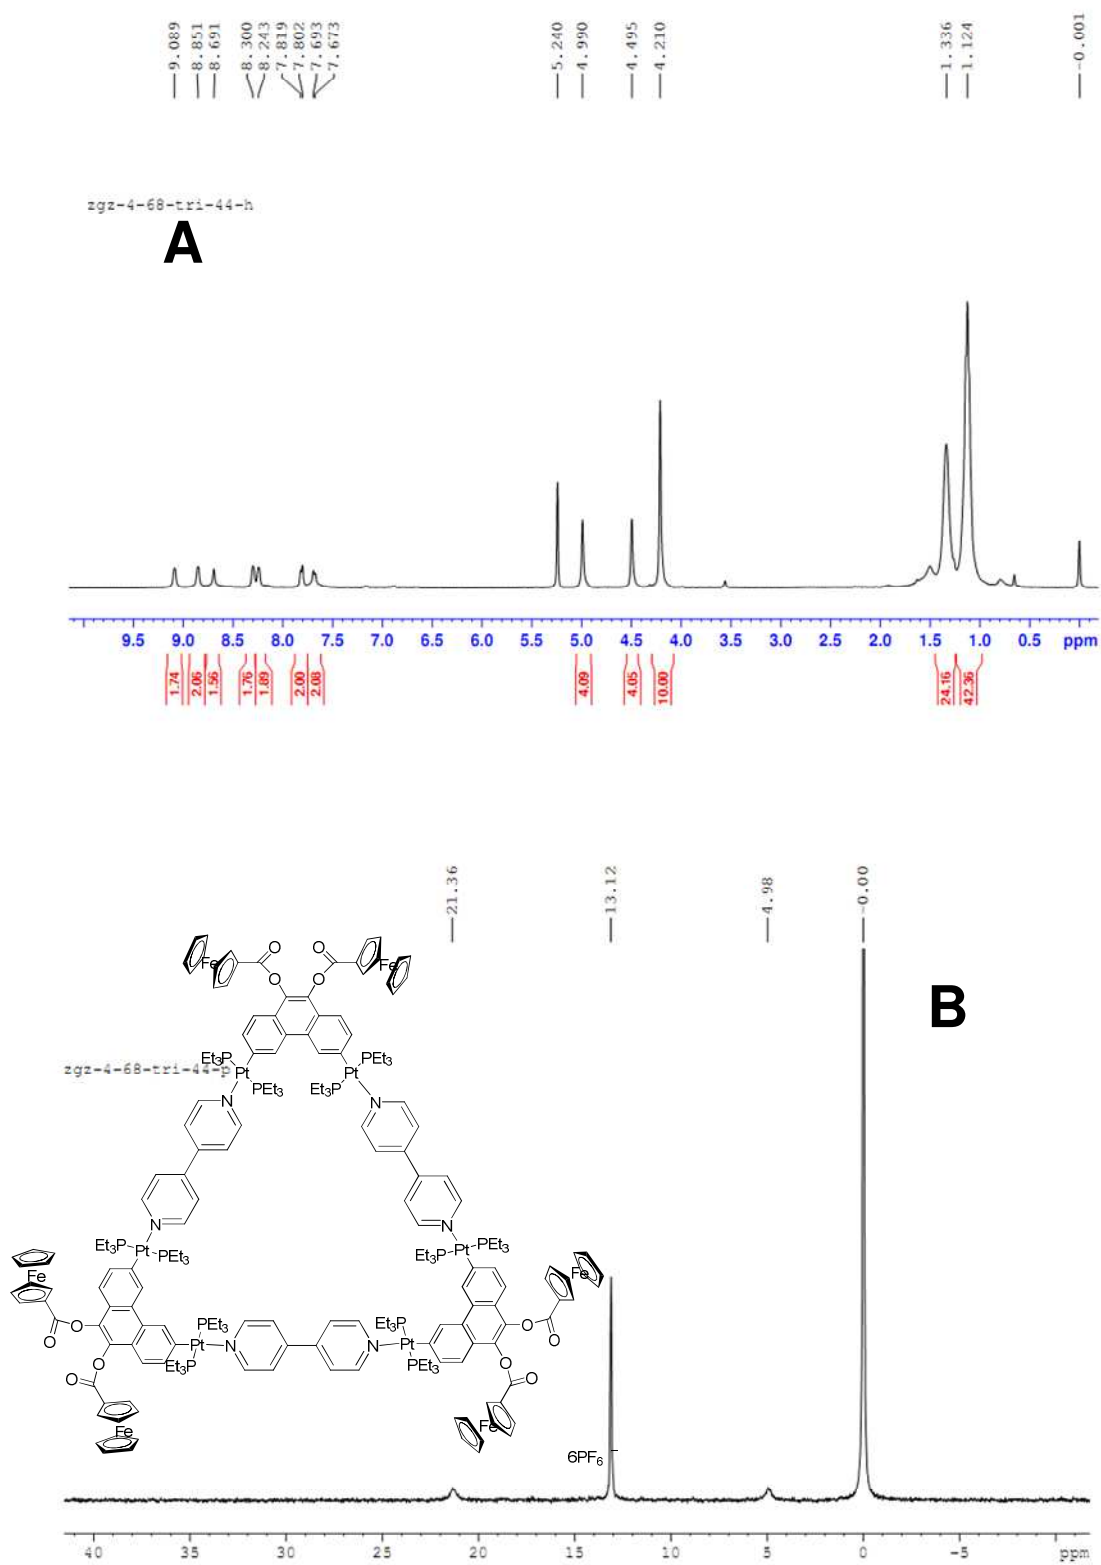

Figure S5. A)  $^1\text{H}$  and B)  $^{31}\text{P}$  NMR Spectra of Complex **6b** in  $\text{CD}_2\text{Cl}_2$

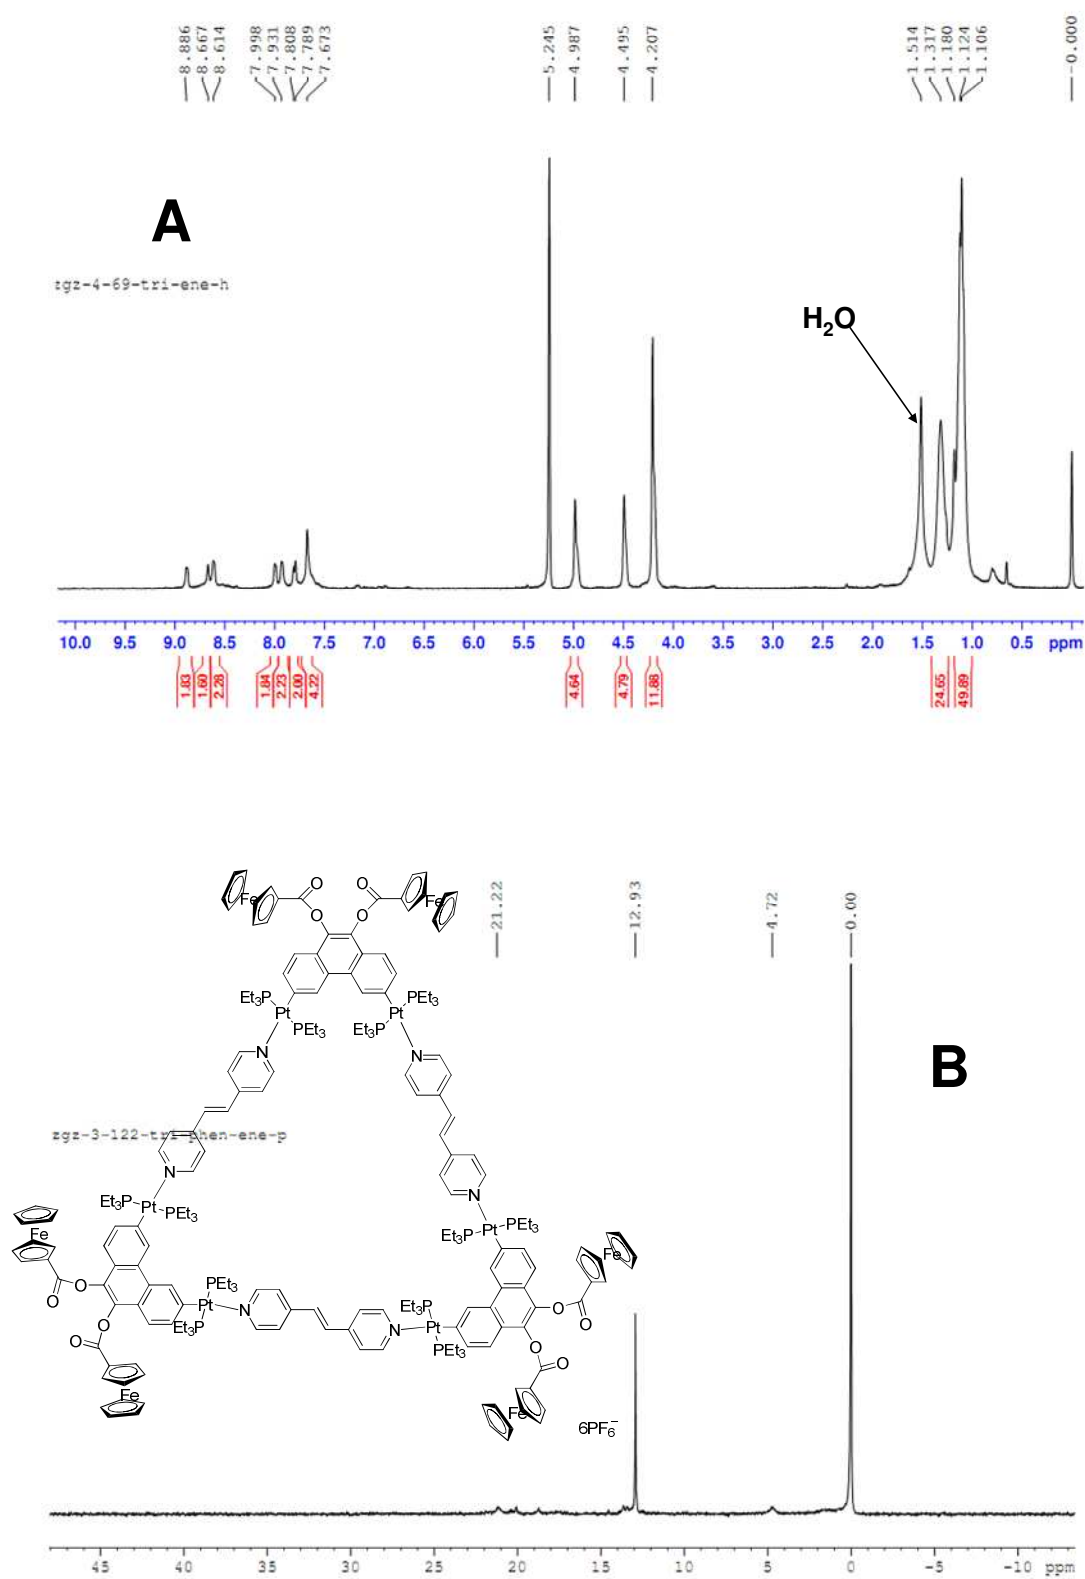

Figure S6. A)  $^1\text{H}$  and B)  $^{31}\text{P}$  NMR Spectra of Complex **6c** in  $\text{CD}_2\text{Cl}_2$

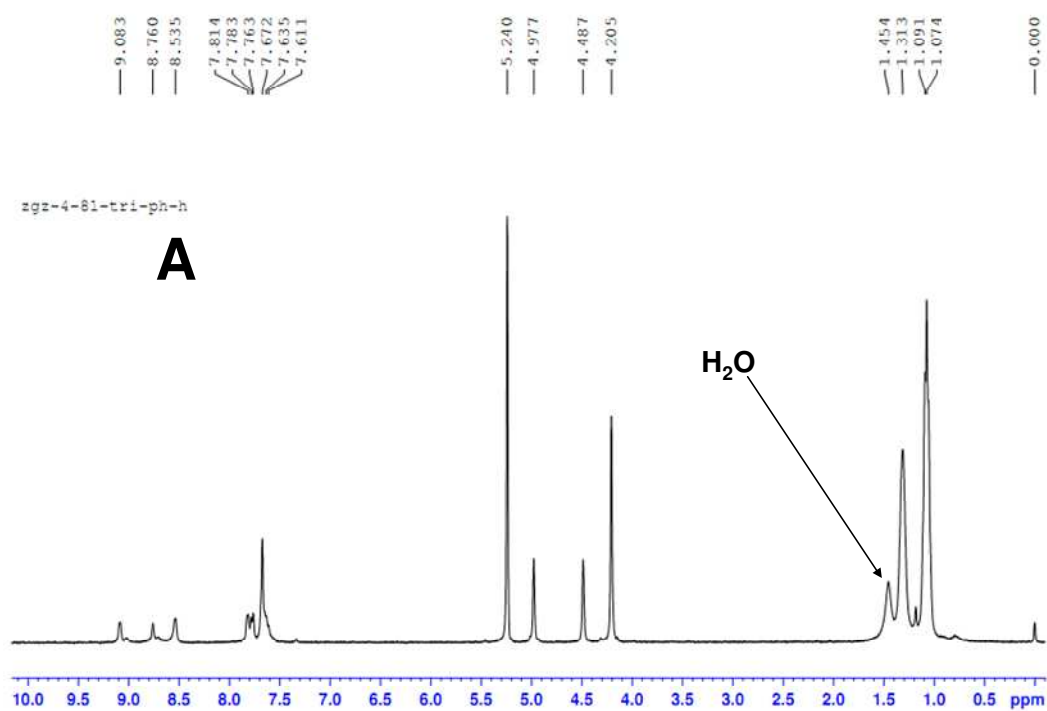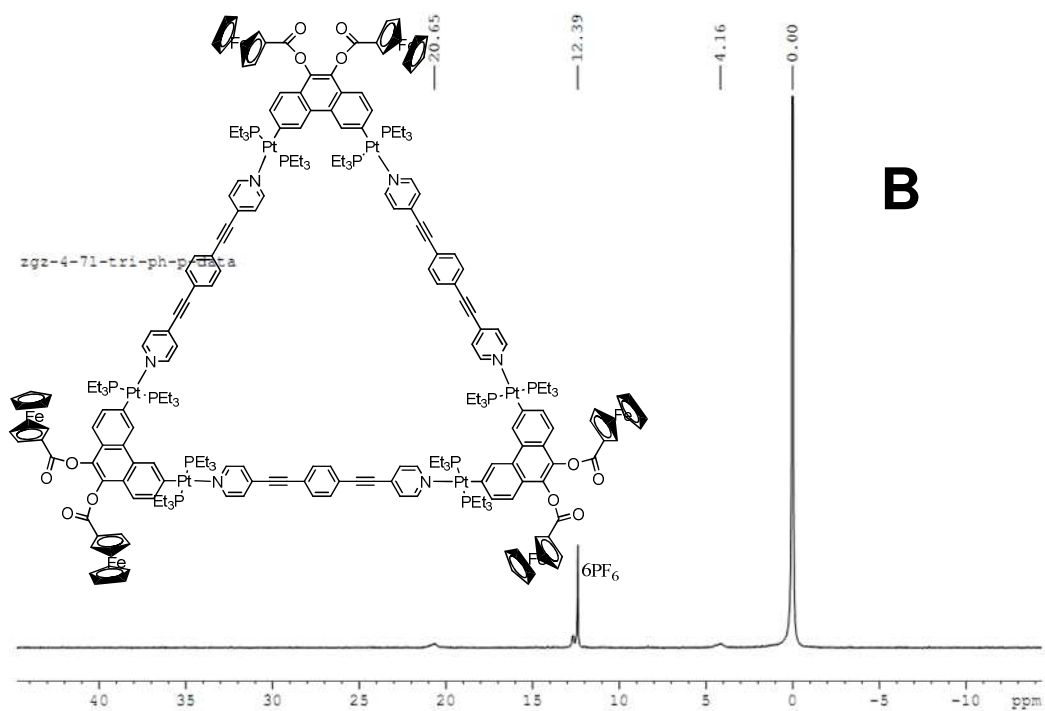

## 4. Cyclic Voltammetry

Cyclic voltammetry (CV) was performed using a 3-electrode cell and a RST electrochemical work station. The working electrode was a glassy carbon disk with surface area of about 7.0 mm<sup>2</sup>. A SCE electrode was used as reference electrode and a Pt wire as the counter electrode.

The CV measurements were carried out in a dichloromethane solution containing 0.2 M tetra-*n*-butylammonium hexafluorophosphate (*n*-Bu<sub>4</sub>NPF<sub>6</sub>). The concentration of redox molecule in solution was: (1) triangle **6a**, 1.99×10<sup>-4</sup> M, (2) triangle **6b**, 1.99×10<sup>-4</sup> M, (3) triangle **6c**, 2.00×10<sup>-4</sup> M. The results of electrochemical studies are summarized in the Table 1 of the main text and shown in Figure S4. Scan rates are indicated in the figures.

In reversible system, the peak current (*i*) with respect to the scanning speed (*v*) can be expressed as:  $i = 0.463 \times n^{3/2} F^{3/2} A (RT)^{-1/2} D^{1/2} C v^{1/2}$ . Where the  $F^{3/2} (RT)^{-1/2}$  is a constant which has a value of 5.81×10<sup>5</sup>; *n* is the mole of electrons transferred per mole of electroactive species (in our system, *n*=1); *A* is the area of the electrode in cm<sup>2</sup>; *D* is the diffusion coefficient in cm<sup>2</sup>/s; *C* is the concentration of samples in mol/mL; and *v* is the scan rate of the potential in volt/s.

A plot of *i* vs  $v^{1/2}$  should give a straight line, the slope of which can be used to determine the diffusion coefficient, if *n*, *A*, and *C* are known. Thus by plotting *i* vs  $v^{1/2}$ , *D* can be evaluated from the slope. The results are outlined in Table1 of main text. The errors of slopes were estimated by fitting the data with two reasonable lines with a maximum slope and a minimum slope and taking one-half of the difference between the max and min slopes.

Figure S7. Cyclic voltammograms of 0.199 mM **6a** (A1), 0.199 mM **6b** (A2), and 2.00 mM **6c** (A3) at a scan rate of 25-250 mV/s and plot of the experimental ratio  $i$  vs  $v^{1/2}$  at a scan rate of 25-250 mV/s (B1-B3 for **6a-c**).

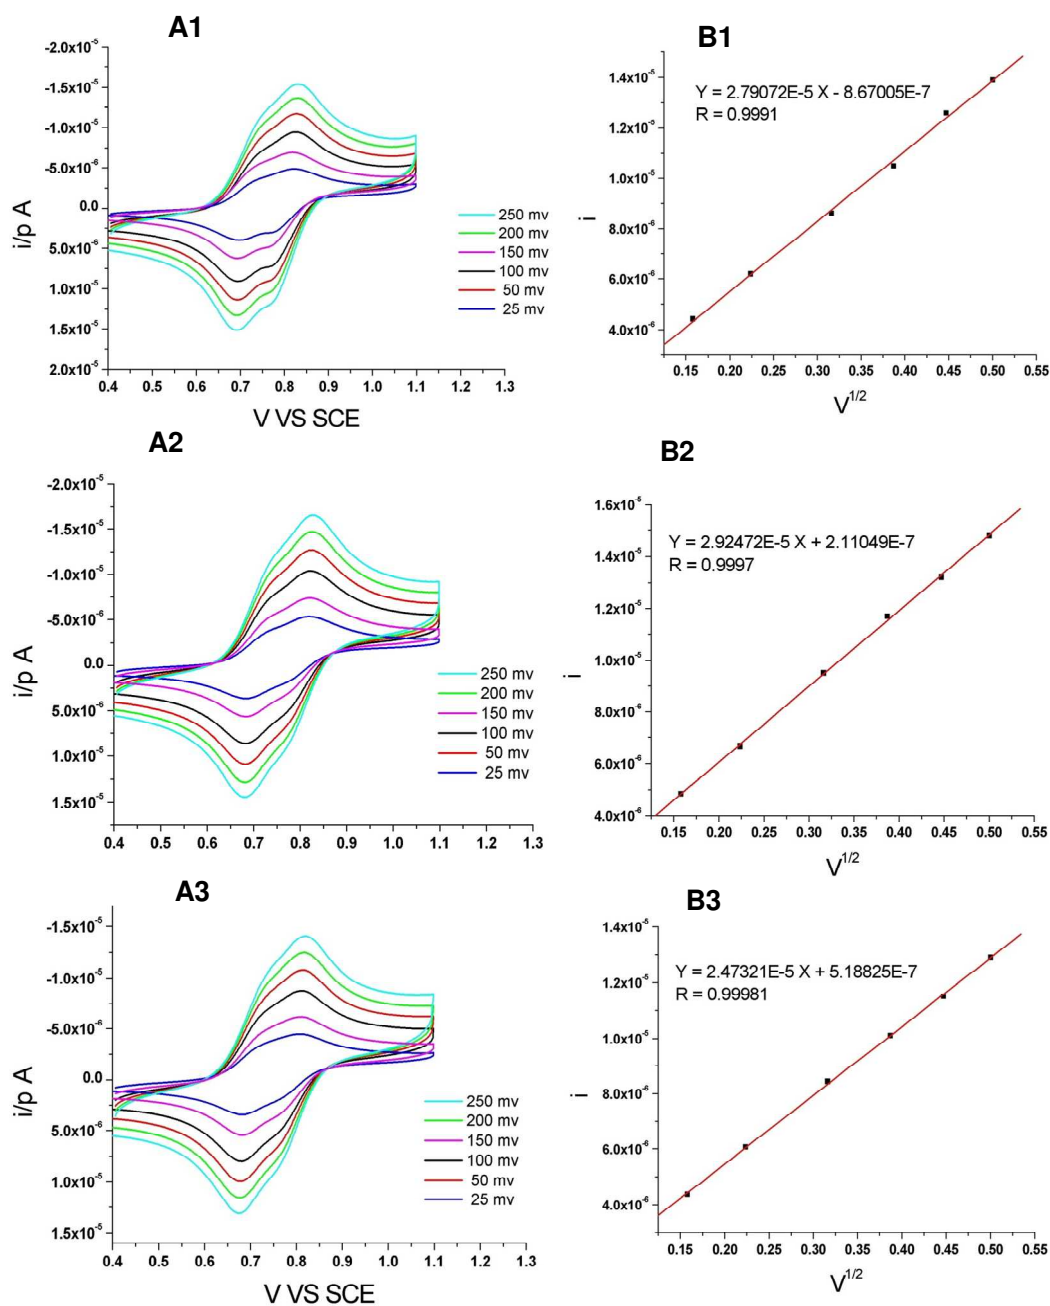

Figure S8. The geometry structures of the **6b** (A) and **6c** (B) optimized by PM6 semiempirical molecular orbital method.

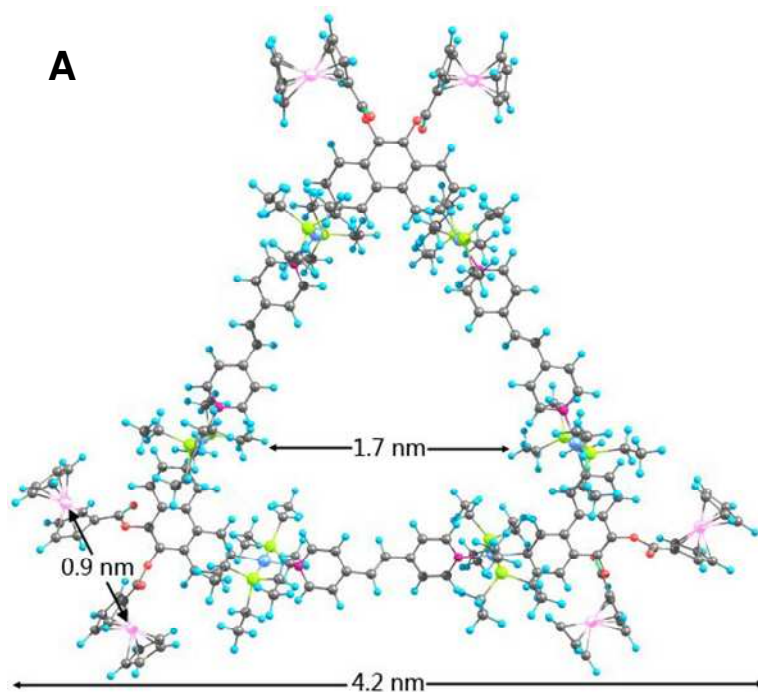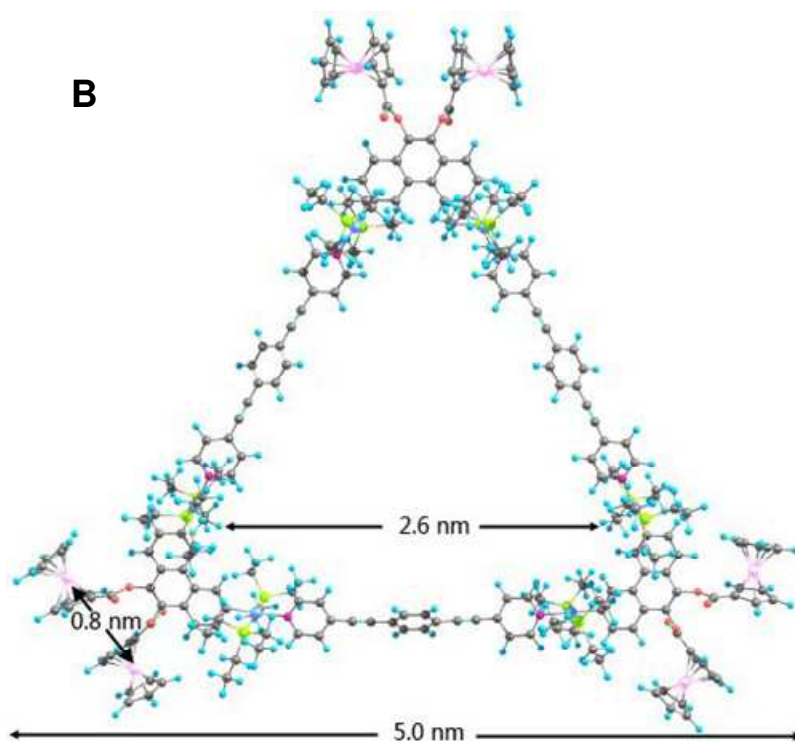

Supplement: Supplementary file 1 [file 4283517]
